# Supplementary material for: Electrochemically reduced graphene porous material as light absorber for light-driven thermoelectric generator
Source: Royal Society of Chemistry journal article supplement (doi:10.1039/c2jm33530a), 2012-01-01
Supplement: c2jm33530a.pdf [file c2jm33530a.pdf]

Electronic Supplementary Information

**Electrochemically Reduced Graphene Porous Material as Light  
Absorber for Light-Driven Thermoelectric Generator**

Yunqiang Chen†, Kaiwu Chen†, Hua Bai\* and Lei Li\*

College of Materials, Xiamen University, Xiamen, 361005, P. R. China

† These authors contributed equally to this work.

\* To whom corresponding should be addressed: baihua@xmu.edu.cn (H. B.),  
lilei@xmu.edu.cn (L. L.).

## 1. XPS of GO and electrochemical reduced CCG

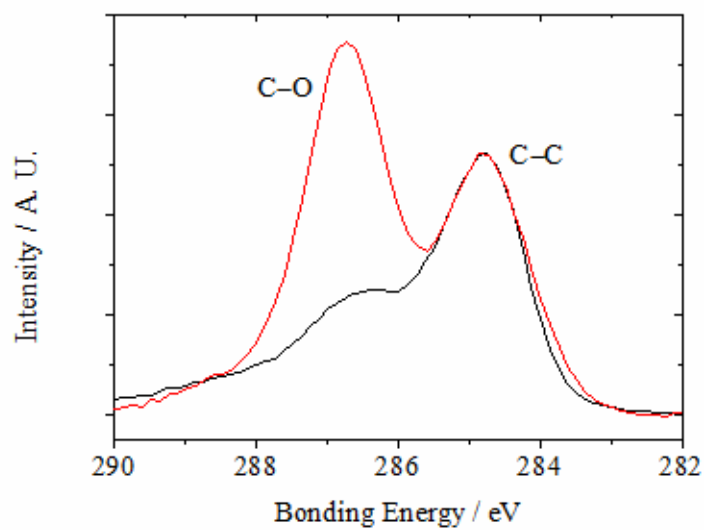

Fig. S1 C 1s peak in XPS of GO (red) and electrochemical reduced CCG (black).

After reduction, The C–O component was reduced significantly. Some residual oxygen may result from incomplete reduction of GO or the adsorbed GO in highly porous surface of reduced CCG.

## 2. SEM images of CCG film.

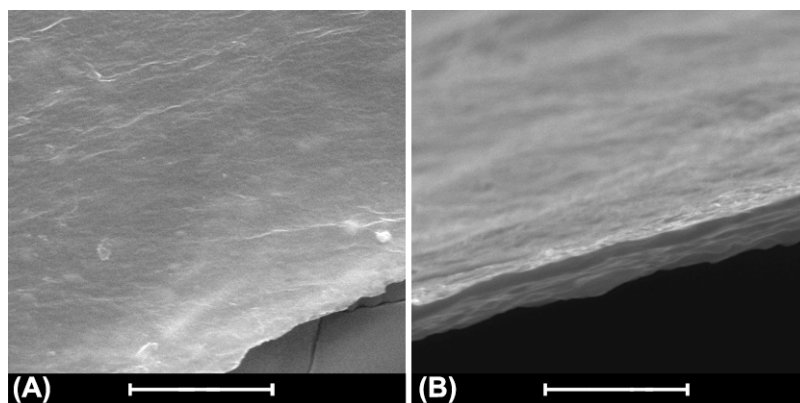

Fig. S2 SEM images of CCG film prepared by drying CCG50 in air. (A) Top view; (B) side view. Scale bar: (A) 10  $\mu\text{m}$ , (B) 5  $\mu\text{m}$ .

Form both image it can be observed that the CCG film is smooth and compact. The thickness of the film is measured to be 1.4  $\mu\text{m}$ .
